## Muscle Relaxation and Lower Airway Characteristics May Affect Tidal Volume during Pressure-controlled Ventilation

### To the Editor:

With great interest, we read the article by Sato *et al.*,<sup>1</sup> which reported the effect of sleep-disordered breathing on tidal volume with mask ventilation during anesthetic induction.

Additional details might better clarify this study and affect the interpretation of the results.

The exact location of the intravenous catheter (upper or lower extremities), which would affect the onset of rocuronium after injection, should be mentioned. Calibration of TOF-Watch is recommended before neuromuscular function monitoring during clinical research<sup>2</sup>; however, it was not adopted in this study. Although statistically insignificant, the uncalibrated train-of-four ratio was higher in the sleep-disordered breathing group. More information about the muscle paralysis in each group should have been provided.

The investigation used a ventilator with pressure-controlled ventilation (peak inspiratory pressure, 15 cm H<sub>2</sub>O). The resistance and compliance were not reported in this article, which could be important, especially in obese subjects. Both the airway and lungs participate in the process of ventilation, not only the pharyngeal airways. The details of lower respiratory airway and lungs are important to interpret the results. Pressure-controlled rather than volume-controlled ventilation was used. The pressure needed for each subject might vary, and could not be preset individually, especially for obese subjects. If volume-controlled ventilation was chosen, however, the tidal volume could be preset conveniently according to ideal body weight. The inspired volume was the specific aim of mask ventilation. Perhaps the peak inspiratory pressure during volume-controlled ventilation could be a better parameter to describe difficult mask ventilation. And the amount of increased peak pressure to achieve the preset tidal volume among patients with sleep-disordered breathing could be explained by a narrowed pharyngeal airway.

To understand better the dynamic changes of ventilation during mask ventilation, and difficult one-hand mask ventilation in patients with obesity and severe sleep-disordered breathing, particularly when expiratory flow limitation occurs during mask ventilation, additional details would be useful.

### Research Support

Supported by National Natural Science Foundation of China (grant No. 81371251; to Dr. Wang).

### Competing Interests

The authors declare no competing interests.

**Zhiqiang Zhou, M.D., Xueren Wang, M.D., Ph.D.** Tongji Hospital, Tongji Medical College, Huazhong University of Science and Technology, Wuhan, China (X.W.). xrwang@hust.edu.cn

### References

1. Sato S, Hasegawa M, Okuyama M, Okazaki J, Kitamura Y, Sato Y, Ishikawa T, Sato Y, Isono S: Mask ventilation during induction of general anesthesia: Influences of obstructive sleep apnea. *ANESTHESIOLOGY* 2017; 126:28–38
2. Fuchs-Buder T, Claudius C, Skovgaard LT, Eriksson LI, Mirakhor RK, Viby-Mogensen J; 8th International Neuromuscular Meeting: Good clinical research practice in pharmacodynamic studies of neuromuscular blocking agents II: The Stockholm revision. *Acta Anaesthesiol Scand* 2007; 51:789–808

(Accepted for publication July 5, 2017.)

## Rocuronium Onset May Affect Mask Ventilation

### To the Editor:

With great interest, we read the article by Sato *et al.*,<sup>1</sup> which reports the influences of obstructive sleep apnea on mask ventilation during induction of general anesthesia by comparing patients with or without sleep-disordered breathing. In addition to the limitations described in the discussion, we note other issues that may have influenced their findings, and the determination of how much of the difference of mask ventilation was caused by obstructive sleep apnea. Specifically, factors influencing the onset time of rocuronium could affect mask ventilation, and these factors were not clearly described.

First, the exact peripheral intravenous sites of rocuronium administration were not described. The onset time of succinylcholine is closely related to drug transit time from the peripheral to the central circulation,<sup>2</sup> and rocuronium has a similar onset time to succinylcholine.<sup>3</sup> For vecuronium, administration into the pulmonary artery shortened the onset time by approximately 40 s compared with a dorsal vein of the hand.<sup>4</sup> Different intravenous sites of rocuronium may produce different onset times. Therefore, the intravenous sites should be similar in the two groups in order to avoid potential bias.

Second, pressure-controlled ventilation was started 20 s after rocuronium injection,<sup>1</sup> but it was not specified whether that was the time from injection start or finish. There is a 5 s difference between start and finish for a 50-kg patient (1 mg/kg) and 1 ml/s injection (5 ml), while the outcomes of mask ventilation were obtained in the 60 s in the study. Also, it was not specified whether all doses were diluted to equal volume and injected with equal speed.

Third, the manuscript did not report parameters relevant to cardiac output, which can affect rocuronium onset.<sup>5</sup> Cardiac output may be lower in patients with obstructive sleep apnea.<sup>6</sup> Heart rate and mean arterial blood pressure might be
